# Supplementary material for: Impact of Information and Communication Technologies on Nursing Care: Results of an Overview of Systematic Reviews
Source: PubMed Central journal article supplement (PMC5424122; doi:10.2196/jmir.6686), 2017-04-25
Supplement: jmir_v19i4e122_app1.pdf [file jmir_v19i4e122_app1.pdf]

## Appendix 1: Search strategies

### PubMed

| Search | Query                                                                                                                                                                                                                                                                                                                                                                                                                                                                                                                                                                                                                                                                                                                                                                                                                                                                                                                                                                                                                                                                                                                                                                                                                                                                                                                                                                                                                                                                                                                                                                                                                                                                                                                                                                                                                                | Results |
|--------|--------------------------------------------------------------------------------------------------------------------------------------------------------------------------------------------------------------------------------------------------------------------------------------------------------------------------------------------------------------------------------------------------------------------------------------------------------------------------------------------------------------------------------------------------------------------------------------------------------------------------------------------------------------------------------------------------------------------------------------------------------------------------------------------------------------------------------------------------------------------------------------------------------------------------------------------------------------------------------------------------------------------------------------------------------------------------------------------------------------------------------------------------------------------------------------------------------------------------------------------------------------------------------------------------------------------------------------------------------------------------------------------------------------------------------------------------------------------------------------------------------------------------------------------------------------------------------------------------------------------------------------------------------------------------------------------------------------------------------------------------------------------------------------------------------------------------------------|---------|
| #57    | (#56 and #52)                                                                                                                                                                                                                                                                                                                                                                                                                                                                                                                                                                                                                                                                                                                                                                                                                                                                                                                                                                                                                                                                                                                                                                                                                                                                                                                                                                                                                                                                                                                                                                                                                                                                                                                                                                                                                        | 1,048   |
| #56    | (#10 and #55)                                                                                                                                                                                                                                                                                                                                                                                                                                                                                                                                                                                                                                                                                                                                                                                                                                                                                                                                                                                                                                                                                                                                                                                                                                                                                                                                                                                                                                                                                                                                                                                                                                                                                                                                                                                                                        | 9,698   |
| #55    | (#11 or #12 or #13 or #14 or #15 or #16 or #19 or #20 or #21 or #22 or #23 or #24 or #25 or #26 or #27 or #28 or #29 or #33 or #34 or #35 or #37 or #38 or #39 or #40 or #41 or #42 or #43 or #44)                                                                                                                                                                                                                                                                                                                                                                                                                                                                                                                                                                                                                                                                                                                                                                                                                                                                                                                                                                                                                                                                                                                                                                                                                                                                                                                                                                                                                                                                                                                                                                                                                                   | 103,615 |
| #54    | (#10 and #52 and #53)                                                                                                                                                                                                                                                                                                                                                                                                                                                                                                                                                                                                                                                                                                                                                                                                                                                                                                                                                                                                                                                                                                                                                                                                                                                                                                                                                                                                                                                                                                                                                                                                                                                                                                                                                                                                                | 1,400   |
| #53    | (#11 or #12 or #13 or #14 or #15 or #16 or #18 or #19 or #20 or #21 or #22 or #23 or #24 or #25 or #26 or #27 or #28 or #29 or #33 or #34 or #35 or #37 or #38 or #39 or #40 or #41 or #42 or #43 or #44)                                                                                                                                                                                                                                                                                                                                                                                                                                                                                                                                                                                                                                                                                                                                                                                                                                                                                                                                                                                                                                                                                                                                                                                                                                                                                                                                                                                                                                                                                                                                                                                                                            | 178,564 |
| #52    | (systematic[sb] OR meta-analysis[pt] OR meta-analysis as topic[mh] OR meta-analysis[mh] OR meta analy*[tw] OR metanaly*[tw] OR metaanaly*[tw] OR met analy*[tw] OR integrative research[tiab] OR integrative review*[tiab] OR integrative overview*[tiab] OR research integration*[tiab] OR research overview*[tiab] OR collaborative review*[tiab] OR collaborative overview*[tiab] OR systematic review*[tiab] OR technology assessment*[tiab] OR technology overview*[tiab] OR "Technology Assessment, Biomedical"[mh] OR HTA[tiab] OR HTAs[tiab] OR comparative efficacy[tiab] OR comparative effectiveness[tiab] OR outcomes research[tiab] OR indirect comparison*[tiab] OR ((indirect treatment[tiab] OR mixed-treatment[tiab]) AND comparison*[tiab]) OR Embase*[tiab] OR Cinahl*[tiab] OR systematic overview*[tiab] OR methodological overview*[tiab] OR methodologic overview*[tiab] OR methodological review*[tiab] OR methodologic review*[tiab] OR quantitative review*[tiab] OR quantitative overview*[tiab] OR quantitative synthes*[tiab] OR pooled analy*[tiab] OR Cochrane[tiab] OR Medline[tiab] OR Pubmed[tiab] OR Medlars[tiab] OR handsearch*[tiab] OR hand search*[tiab] OR meta-regression*[tiab] OR metaregression*[tiab] OR data synthes*[tiab] OR data extraction[tiab] OR data abstraction*[tiab] OR mantel haenszel[tiab] OR peto[tiab] OR der-simonian[tiab] OR dersimonian[tiab] OR fixed effect*[tiab] OR "Cochrane Database Syst Rev"[Journal:_jrid21711] OR "health technology assessment winchester, england"[Journal] OR "Evid Rep Technol Assess (Full Rep)"[Journal] OR "Evid Rep Technol Assess (Summ)"[Journal] OR "Int J Technol Assess Health Care"[Journal] OR "GMS Health Technol Assess"[Journal] OR "Health Technol Assess (Rockv)"[Journal] OR "Health Technol Assess Rep"[Journal]) | 316,978 |
| #44    | (smartphone or smart phone)                                                                                                                                                                                                                                                                                                                                                                                                                                                                                                                                                                                                                                                                                                                                                                                                                                                                                                                                                                                                                                                                                                                                                                                                                                                                                                                                                                                                                                                                                                                                                                                                                                                                                                                                                                                                          | 1,295   |
| #43    | Cellular Phone[mesh]                                                                                                                                                                                                                                                                                                                                                                                                                                                                                                                                                                                                                                                                                                                                                                                                                                                                                                                                                                                                                                                                                                                                                                                                                                                                                                                                                                                                                                                                                                                                                                                                                                                                                                                                                                                                                 | 5,014   |

|     |                                                      |         |
|-----|------------------------------------------------------|---------|
| #42 | Medical Order Entry Systems[mesh]                    | 1,493   |
| #41 | Health Records, Personal[mesh]                       | 718     |
| #40 | Reminder Systems[mesh]                               | 2,244   |
| #39 | Health Information Systems[mesh]                     | 299     |
| #38 | Decision Support Systems, Clinical[mesh]             | 4,838   |
| #37 | Electronic Mail[mesh]                                | 1,866   |
| #35 | Computers, Handheld[mesh]                            | 2,323   |
| #34 | web-based intervention*                              | 401     |
| #33 | (web site* or website*)                              | 18,625  |
| #29 | (sms or short message service)                       | 5,156   |
| #28 | pda*                                                 | 10,805  |
| #27 | personal digital assistant*                          | 898     |
| #26 | ict                                                  | 3,494   |
| #25 | ("information and communication technolog*")         | 12,717  |
| #24 | information technolog*                               | 13,553  |
| #23 | telecare                                             | 2,508   |
| #22 | (ehealth or e-health)                                | 20,101  |
| #21 | telehealthcare                                       | 62      |
| #20 | telehealth                                           | 18,529  |
| #19 | Public Health Informatics                            | 3,883   |
| #16 | Electronic Health Record*                            | 9,904   |
| #15 | Telenursing                                          | 210     |
| #14 | (Telemedicine or tele medicine or tele-medicine)     | 18,314  |
| #13 | remote communication*                                | 37      |
| #12 | Remote Consultation*                                 | 3,709   |
| #11 | Decision Making, Computer-Assisted/nurs*             | 925     |
| #10 | (#1 or #2 or #3 of #4 or #5 or #6 or #7 or #8 or #9) | 732,152 |
| #9  | Nurs*                                                | 731,812 |
| #8  | Nursing [Subheading]                                 | 116,730 |
| #7  | Nursing Diagnosis [Mesh]                             | 3,841   |

|    |                                             |         |
|----|---------------------------------------------|---------|
| #6 | Nursing Care [Mesh]                         | 118,176 |
| #5 | Evidence-Based Nursing [Mesh]               | 2,184   |
| #4 | Advanced Practice Nursing [Mesh]            | 834     |
| #3 | Nursing Assessment[MeSH Major Topic]        | 12,306  |
| #2 | Nurse's Role[MeSH Major Topic]              | 15,805  |
| #1 | Nurse's Practice Patterns[MeSH Major Topic] | 783     |

## CINAHL

| Search | Query                                                                                                                                                                                                                                                                                                                                                                                                                                                                                                                                                                                                                                                                                                                                                                                                                                                                                                                                                                                                                                                                                      | Results |
|--------|--------------------------------------------------------------------------------------------------------------------------------------------------------------------------------------------------------------------------------------------------------------------------------------------------------------------------------------------------------------------------------------------------------------------------------------------------------------------------------------------------------------------------------------------------------------------------------------------------------------------------------------------------------------------------------------------------------------------------------------------------------------------------------------------------------------------------------------------------------------------------------------------------------------------------------------------------------------------------------------------------------------------------------------------------------------------------------------------|---------|
| #43    | #41 AND #42                                                                                                                                                                                                                                                                                                                                                                                                                                                                                                                                                                                                                                                                                                                                                                                                                                                                                                                                                                                                                                                                                | 475     |
| #42    | (TI (systematic* n3 review*)) or (AB (systematic* n3 review*)) or (TI (systematic* n3 bibliographic*)) or (AB (systematic* n3 bibliographic*)) or (TI (systematic* n3 literature)) or (AB (systematic* n3 literature)) or (TI (comprehensive* n3 literature)) or (AB (comprehensive* n3 literature)) or (TI (comprehensive* n3 bibliographic*)) or (AB (comprehensive* n3 bibliographic*)) or (TI (integrative n3 review)) or (AB (integrative n3 review)) or (JN "Cochrane Database of Systematic Reviews") or (TI (information n2 synthesis)) or (TI (data n2 synthesis)) or (AB (information n2 synthesis)) or (AB (data n2 synthesis)) or (TI (data n2 extract*)) or (AB (data n2 extract*)) or (TI (medline or pubmed or psyclit or cinahl or (psycinfo not "psycinfo database") or "web of science" or scopus or embase)) or (AB (medline or pubmed or psyclit or cinahl or (psycinfo not "psycinfo database") or "web of science" or scopus or embase)) or (MH "Systematic Review") or (MH "Meta Analysis") or (TI (meta-analy* or metaanaly*)) or (AB (meta-analy* or metaanaly*)) | 79,479  |
| #41    | (#1 OR #2 OR #3 OR #4 OR #5 OR #6 OR #7 OR #8 OR #9 OR #10) AND (#39 AND #40)                                                                                                                                                                                                                                                                                                                                                                                                                                                                                                                                                                                                                                                                                                                                                                                                                                                                                                                                                                                                              | 10,745  |
| #40    | #1 OR #2 OR #3 OR #4 OR #5 OR #6 OR #7 OR #8 OR #9                                                                                                                                                                                                                                                                                                                                                                                                                                                                                                                                                                                                                                                                                                                                                                                                                                                                                                                                                                                                                                         | 96,152  |
| #39    | (#11 OR #12 OR #13 OR #14 OR #15 OR #16 OR #17 OR #18 OR #19 OR #20 OR #21 OR #22 OR #23 OR #24 OR #25 OR #26 OR #27 OR #28 OR #29 OR #30 OR #31 OR #32 OR #33 OR #34 OR #35 OR #36 OR #37 OR #38)                                                                                                                                                                                                                                                                                                                                                                                                                                                                                                                                                                                                                                                                                                                                                                                                                                                                                         | 299,359 |
| #38    | TX smartphone or smart phone                                                                                                                                                                                                                                                                                                                                                                                                                                                                                                                                                                                                                                                                                                                                                                                                                                                                                                                                                                                                                                                               | 4,676   |
| #37    | MH Wireless Communications                                                                                                                                                                                                                                                                                                                                                                                                                                                                                                                                                                                                                                                                                                                                                                                                                                                                                                                                                                                                                                                                 | 9,143   |
| #36    | MH Electronic Order Entry                                                                                                                                                                                                                                                                                                                                                                                                                                                                                                                                                                                                                                                                                                                                                                                                                                                                                                                                                                                                                                                                  | 2,262   |
| #35    | MH Medical Records, Personal                                                                                                                                                                                                                                                                                                                                                                                                                                                                                                                                                                                                                                                                                                                                                                                                                                                                                                                                                                                                                                                               | 740     |

|     |                                                     |         |
|-----|-----------------------------------------------------|---------|
| #34 | MH Computers, Hand-Held                             | 3,094   |
| #33 | MH Reminder Systems                                 | 1,743   |
| #32 | MH Health Information Systems                       | 1,782   |
| #31 | MH Decision Support Systems, Clinical               | 2,649   |
| #30 | MH Electronic Mail                                  | 4,453   |
| #29 | TX web-based intervention*                          | 7,779   |
| #28 | TX (web site* or website*)                          | 132,221 |
| #27 | TX (sms or short message service)                   | 9,272   |
| #26 | TX pda*                                             | 4,038   |
| #25 | TX personal digital assistant*                      | 4,637   |
| #24 | TX ict                                              | 4,674   |
| #23 | TX information and communication technolog*         | 40,595  |
| #22 | TX information technolog*                           | 135,116 |
| #21 | TX telecare                                         | 2,511   |
| #20 | TX (ehealth or e-health)                            | 5,190   |
| #19 | TX telehealthcare                                   | 86      |
| #18 | TX telehealth                                       | 6,574   |
| #17 | TX Public Health Informatics                        | 9,436   |
| #16 | TX Electronic Health Record*                        | 39,897  |
| #15 | TX Telenursing                                      | 1,857   |
| #14 | TX (Telemedicine or tele medicine or tele-medicine) | 12,775  |
| #13 | TX remote communication*                            | 10,314  |
| #12 | MH Remote Consultation                              | 1,166   |
| #11 | MH Decision Making, Computer Assisted               | 1,021   |
| #9  | MH Nursing Diagnosis                                | 3,726   |
| #8  | MH Nursing Care                                     | 16,328  |
| #7  | MH Nursing Practice, Evidence-Based                 | 7,644   |
| #6  | MH Advanced Nursing Practice                        | 7,886   |
| #5  | MH nursing assessment                               | 15,029  |
| #4  | MH nursing role                                     | 41,332  |

|    |                        |       |
|----|------------------------|-------|
| #3 | MH practice patterns   | 9,901 |
| #2 | MM "Practice Patterns" | 6,282 |
| #1 | MJ Practice Patterns   | 6,377 |

## Cochrane

| Search | Query                                                                                                       | Results |
|--------|-------------------------------------------------------------------------------------------------------------|---------|
| #21    | DARE, Cochrane Reviews, HTA                                                                                 | 2,502   |
| #20    | #1 and #19                                                                                                  | 4,332   |
| #19    | #2 or #3 or #4 or #5 or #6 or #7 or #8 or #9 or #10 or #11 or #12 or #13 or #14 or #15 or #16 or #17 or #18 | 20,774  |
| #18    | smartphone or smart phone                                                                                   | 162     |
| #17    | web-based intervention*                                                                                     | 1,679   |
| #16    | web site* or website*                                                                                       | 5,009   |
| #15    | sms or short message service                                                                                | 684     |
| # 14   | pda*                                                                                                        | 604     |
| #13    | personal digital assistant*                                                                                 | 230     |
| #12    | ict                                                                                                         | 230     |
| #11    | information and communication technolog*                                                                    | 931     |
| #10    | information technolog*                                                                                      | 9,143   |
| #9     | telecare                                                                                                    | 290     |
| #8     | ehealth or e-health                                                                                         | 381     |
| #7     | telehealth*                                                                                                 | 371     |
| #6     | Public Health Informatics                                                                                   | 93      |
| #5     | Electronic Health Record*                                                                                   | 7,326   |
| #4     | Telenursing                                                                                                 | 37      |
| #3     | Telemedicine or tele medicine or tele-medicine                                                              | 1,607   |
| #2     | remote communication*                                                                                       | 302     |
| #1     | nurs*                                                                                                       | 27,166  |

## Embase

| Search | Query                                                                                                                                                                                     | Results |
|--------|-------------------------------------------------------------------------------------------------------------------------------------------------------------------------------------------|---------|
| #50    | #39 and #49                                                                                                                                                                               | 817     |
| #49    | #40 or #41 or #42 or #43 or #44 or #45 or #46 or #47 or #48                                                                                                                               | 245,837 |
| #48    | comparative near/3 (efficacy or effectiveness)                                                                                                                                            | 20,459  |
| #47    | meta next/1 regression* or metaregression*                                                                                                                                                | 3,768   |
| #46    | met next/1 analy* or metanaly* or technology next/1 assessment* or hta or htas or technology next/1 overview* or technology next/1 appraisal*                                             | 25,758  |
| #45    | 'mantel haenszel' or peto or 'der simonian' or dersimonian or fixed next/1 effect* or latin next/1 square*                                                                                | 19,314  |
| #44    | handsearch* or (hand and search*)                                                                                                                                                         | 13,339  |
| #43    | data next/1 synthes* or data next/1 extraction* or data next/1 abstraction*                                                                                                               | 20,456  |
| #42    | integrative near/3 (review* or overview*) or collaborative near/3 (review* or overview*) or pool* near/3 analy*                                                                           | 16,729  |
| #41    | quantitative near/3 (review* or overview* or synthes*) or research near/3 (integrati* or overview*)                                                                                       | 21,348  |
| #40    | 'systematic review'/exp or 'meta-analysis'/exp                                                                                                                                            | 137,848 |
| #39    | #10 and #38                                                                                                                                                                               | 27,532  |
| #38    | #11 or #12 or #13 or #14 or #15 or #16 or #17 or #18 or #19 or #20 or #21 or #22 or #23 or #24 or #25 or #26 or #27 or #28 or #29 or #30 or #31 or #32 or #33 or #34 or #35 or #36 or #37 | 299,928 |
| #37    | smartphone or smart next/1 phone                                                                                                                                                          | 1,714   |
| #36    | 'cellular phone'/exp                                                                                                                                                                      | 8,515   |
| #35    | 'medical order entry systems'/exp                                                                                                                                                         | 17,424  |
| #34    | 'health records, personal'/exp                                                                                                                                                            | 147,252 |
| #33    | 'reminder systems'/exp                                                                                                                                                                    | 1,521   |
| #32    | 'health information systems'/exp                                                                                                                                                          | 14,489  |
| #31    | 'decision support systems, clinical'/exp                                                                                                                                                  | 13,324  |
| #30    | 'electronic mail'/exp                                                                                                                                                                     | 10,032  |
| #29    | 'computers, handheld'/exp                                                                                                                                                                 | 13,685  |

|     |                                                    |         |
|-----|----------------------------------------------------|---------|
| #28 | 'web based' next/1 intervention*                   | 469     |
| #27 | website* or web next/1 site*                       | 24,402  |
| #26 | sms or 'short message service'                     | 6,528   |
| #25 | pda*                                               | 19,566  |
| #24 | 'personal digital' next/1 assistant*               | 1,348   |
| #23 | ict                                                | 5,592   |
| #22 | communication next/1 technolog*                    | 2,884   |
| #21 | information next/1 technolog*                      | 24,938  |
| #20 | ehealth*                                           | 1,619   |
| #19 | telecar*                                           | 2,831   |
| #18 | telehealth*                                        | 3,240   |
| #17 | 'public health informatics'                        | 289     |
| #16 | 'electronic health record'                         | 3,421   |
| #15 | telenursing                                        | 226     |
| #14 | telemedicine or 'tele medicine'                    | 17,460  |
| #13 | remote next/1 communication*                       | 42      |
| #12 | remote next/1 consultation*                        | 240     |
| #11 | 'decision making, computer-assisted'/exp           | 13,324  |
| #10 | #1 or #2 or #3 or #4 or #5 or #6 or #7 or #8 or #9 | 824,943 |
| #9  | nurs*                                              | 824,501 |
| #8  | 'nursing'/exp                                      | 339,695 |
| #7  | 'nursing diagnosis'/exp                            | 3,662   |
| #6  | 'nursing care'/exp                                 | 30,587  |
| #5  | 'evidence based nursing'/exp                       | 2,268   |
| #4  | 'advanced practice nursing'/exp                    | 979     |
| #3  | 'nursing assessment'/exp                           | 28,476  |
| #2  | 'nurse attitude'/exp                               | 33,230  |
| #1  | 'nursing practice'/exp                             | 3,503   |

## Epistemonikos

| Query                                                                                                                                                  | Results |
|--------------------------------------------------------------------------------------------------------------------------------------------------------|---------|
| (nurs* AND tele* OR information technolog* OR communicati* technolog* or ICT or emr or ehr or electronic health record* or electronic medical record*) | 894     |

## Web of Science

| Search | Query                                                                                                              | Results               |
|--------|--------------------------------------------------------------------------------------------------------------------|-----------------------|
| # 25   | #24 AND #21                                                                                                        | 451                   |
| # 24   | #23 OR #22                                                                                                         | Approximately 651,677 |
| # 23   | TOPIC: (systematic review)                                                                                         | Approximately 306,063 |
| # 22   | TOPIC: (meta-analysis or metaanalysis or meta analysis)                                                            | Approximately 423,202 |
| # 21   | #20 AND #1                                                                                                         | Approximately 18,415  |
| # 20   | #19 OR #18 OR #17 OR #16 OR #15 OR #14 OR #13 OR #12 OR #11 OR #10 OR #9 OR #8 OR #7 OR #6 OR #5 OR #4 OR #3 OR #2 | Approximately 635,643 |
| # 19   | TOPIC: (smartphone or smart phone)                                                                                 | Approximately 13,177  |
| # 18   | TOPIC: (Electronic Mail)                                                                                           | Approximately 10,054  |
| # 17   | TOPIC: (web site* or website*)                                                                                     | Approximately 119,442 |
| # 16   | TOPIC: (sms or short message service)                                                                              | Approximately 19,538  |
| # 15   | TOPIC: (pda*)                                                                                                      | Approximately 47,576  |
| # 14   | TOPIC: (personal digital assistant*)                                                                               | 2,732                 |
| # 13   | TOPIC: (ict)                                                                                                       | Approximately 28,076  |

|      |                                                         |                            |
|------|---------------------------------------------------------|----------------------------|
| # 12 | TOPIC: (information and communication technolog*)       | Approximately<br>57,260    |
| # 11 | TOPIC: (information technolog*)                         | Approximately<br>342,198   |
| # 10 | TOPIC: (telecare)                                       | 977                        |
| # 9  | TOPIC: (ehealth or e-health)                            | Approximately<br>8,021     |
| # 8  | TOPIC: (telehealth)                                     | Approximately<br>6,320     |
| # 7  | TOPIC: (telehealth)                                     | Approximately<br>6,320     |
| # 6  | TOPIC: (Public Health Informatics)                      | Approximately<br>5,530     |
| # 5  | TOPIC: (Electronic Health Record*)                      | Approximately<br>36,111    |
| # 4  | TOPIC: (Telenursing)                                    | 252                        |
| # 3  | TOPIC: (Telemedicine or tele medicine or tele-medicine) | Approximately<br>33,391    |
| # 2  | TOPIC: (remote communication*)                          | Approximately<br>20,406    |
| # 1  | TOPIC: (nurs*)                                          | Approximately<br>1,020,251 |
