# Supplementary material for: Impact of Information and Communication Technologies on Nursing Care: Results of an Overview of Systematic Reviews
Source: PubMed Central journal article supplement (PMC5424122; doi:10.2196/jmir.6686), 2017-04-25
Supplement: jmir_v19i4e122_app3.pdf [file jmir_v19i4e122_app3.pdf]

### Appendix 3. Excluded articles

| No outcomes related to nursing practice (no primary findings) | Nurses-related findings inseparable from other healthcare professionals | Had an updated review | Proceeding abstract only (no full review found) | Protocol only (no full review found) | No study in the review | Insufficient details on methodology (doubt on systematization) | Review objective carries on acceptance, attitude and factors of adoption of ICT |
|---------------------------------------------------------------|-------------------------------------------------------------------------|-----------------------|-------------------------------------------------|--------------------------------------|------------------------|----------------------------------------------------------------|---------------------------------------------------------------------------------|
| Akesson 2007                                                  | Arditi 2012                                                             | Currell 2003          | Clark 2010                                      | Koivunen 2014                        | Martin 2008            | Bakken 2006                                                    | Brewster 2013                                                                   |
| Anderson 2012                                                 | Bassi 2010                                                              |                       | MacLure 2011                                    |                                      |                        | Merksouris 1995                                                | Gagnon 2012                                                                     |
| Atherton 2012                                                 | Dorr 2007                                                               |                       | MacLure 2014a                                   |                                      |                        |                                                                | Huryk 2010                                                                      |
| Chippis 2012                                                  | Jennett 2003                                                            |                       |                                                 |                                      |                        |                                                                | McGinn 2011                                                                     |
| Clark 2013                                                    | Kawamoto 2005                                                           |                       |                                                 |                                      |                        |                                                                | Young 2011                                                                      |
| Currell 2000                                                  | Keane 2009                                                              |                       |                                                 |                                      |                        |                                                                |                                                                                 |
| Du 2013                                                       | Kukreti 2014                                                            |                       |                                                 |                                      |                        |                                                                |                                                                                 |
| Durieux 2008                                                  | Lindberg 2013                                                           |                       |                                                 |                                      |                        |                                                                |                                                                                 |
| Gagnon 2010                                                   | MacLure 2014b                                                           |                       |                                                 |                                      |                        |                                                                |                                                                                 |
| Hemens 2011                                                   | McGowan 2009                                                            |                       |                                                 |                                      |                        |                                                                |                                                                                 |
| Holroyd-Leduc 2011                                            | McKibbin 2012                                                           |                       |                                                 |                                      |                        |                                                                |                                                                                 |
| Inglis 2010                                                   | Pearson 2009                                                            |                       |                                                 |                                      |                        |                                                                |                                                                                 |
| Johansson 2010                                                | Vedel 2013                                                              |                       |                                                 |                                      |                        |                                                                |                                                                                 |
| Lluch 2011                                                    |                                                                         |                       |                                                 |                                      |                        |                                                                |                                                                                 |
| Nguyen 2015                                                   |                                                                         |                       |                                                 |                                      |                        |                                                                |                                                                                 |
| Osborn 2010                                                   |                                                                         |                       |                                                 |                                      |                        |                                                                |                                                                                 |
| Pappas 2012                                                   |                                                                         |                       |                                                 |                                      |                        |                                                                |                                                                                 |
| Roine 2001                                                    |                                                                         |                       |                                                 |                                      |                        |                                                                |                                                                                 |
| Roshanov 2011                                                 |                                                                         |                       |                                                 |                                      |                        |                                                                |                                                                                 |
| Sant'Anna Vargas 2013                                         |                                                                         |                       |                                                 |                                      |                        |                                                                |                                                                                 |
| Sawmynaden 2012                                               |                                                                         |                       |                                                 |                                      |                        |                                                                |                                                                                 |
| Shojania Kaveh 2009                                           |                                                                         |                       |                                                 |                                      |                        |                                                                |                                                                                 |
| Wei 2011                                                      |                                                                         |                       |                                                 |                                      |                        |                                                                |                                                                                 |
| Yu 2012                                                       |                                                                         |                       |                                                 |                                      |                        |                                                                |                                                                                 |

## References of excluded articles

Akesson, K. M., Saveman, B. I., & Nilsson, G. (2007). Health care consumers' experiences of information communication technology-A summary of literature. *International Journal of Medical Informatics*, 76(9), 633-645.

Anderson, L. S., & Enge, K. J. (2012). Education and Information for Practicing School Nurses: Which Technology-Supported Resources Meet Their Needs? *Journal of School Nursing (Sage Publications Inc.)*, 28(5), 358-369. doi:10.1177/1059840512443261.

Arditi, C., Rège-Walther, M., Wyatt Jeremy, C., Durieux, P., & Burnand, B. (2012). Computer-generated reminders delivered on paper to healthcare professionals; effects on professional practice and health care outcomes. *Cochrane Database of Systematic Reviews*, (12). Retrieved from <http://onlinelibrary.wiley.com/doi/10.1002/14651858.CD001175.pub3/abstract>  
doi:10.1002/14651858.CD001175.pub3

Atherton, H., Sawmynaden, P., Meyer, B., & Car, J. (2012). Email for the coordination of healthcare appointments and attendance reminders. *Cochrane Database of Systematic Reviews*, (8). Retrieved from <http://onlinelibrary.wiley.com/doi/10.1002/14651858.CD007981.pub2/abstract> doi:10.1002/14651858.CD007981.pub2

Bakken, S. (2006). Informatics for patient safety: a nursing research perspective. *Annu Rev Nurs Res*, 24, 219-254.

Bassi, J., Lau, F., & Bardal, S. (2010). Use of information technology in medication reconciliation: a scoping review. *Ann Pharmacother*, 44(5), 885-897. doi:10.1345/aph.1M699

Brewster, L., Mountain, G., Wessels, B., Kelly, C., & Hawley, M. (2013). Factors affecting front line staff acceptance of telehealth technologies: a mixed-method systematic review. *J Adv Nurs*. doi:10.1111/jan.12196

Chipps, J., Brysiewicz, P., & Mars, M. (2012). Effectiveness and feasibility of telepsychiatry in resource constrained environments? A systematic review of the evidence. *African Journal of Psychiatry (South Africa)*, 15(4), 235-243.

Clarke, M. A., Belden, J. L., Koopman, R. J., Steege, L. M., Moore, J. L., Canfield, S. M., & Kim, M. S. (2013). Information needs and information-seeking behaviour analysis of primary care physicians and nurses: a literature review. *Health Info Libr J*, 30(3), 178-190. doi:10.1111/hir.12036

Clark, R. A., Inglis, S. C., McAlister, F. A., Ball, J., Lewinter, C., Cullington, D., . . . Cleland, J. G. F. (2010). Results from a systematic review and meta-analysis of remote (non-invasive) monitoring in 8,323 heart failure patients on length of stay, quality of life, knowledge, compliance and satisfaction. *European Journal of Heart Failure, Supplement*, 9, S51-S52.

Currell, R., & Urquhart, C. (2003). Nursing record systems: effects on nursing practice and health care outcomes. *Cochrane Database Syst Rev*(3), Cd002099. doi:10.1002/14651858.cd002099

Currell, R., Urquhart, C., Wainwright, P., & Lewis, R. (2000). Telemedicine versus face to face patient care: effects on professional practice and health care outcomes. *Cochrane Database of Systematic Reviews*(2). doi:10.1002/14651858.CD002098

Dorr, D., Bonner, L. M., Cohen, A. N., Shoai, R. S., Perrin, R., Chaney, E., & Young, A. S. (2007). Informatics systems to promote improved care for chronic illness: a literature review. *J Am Med Inform Assoc*, 14(2), 156-163. doi:10.1197/jamia.M2255

Du, S., Liu, Z., Liu, S., Yin, H., Xu, G., Zhang, H., & Wang, A. (2013). Web-based distance learning for nurse education: a systematic review. *International Nursing Review*, 60(2), 167-177.

Durieux, P., Trinquart, L., Colombet, I., Nies, J., Walton, R., Rajeswaran, A., . . . Burnand, B. (2008). Computerized advice on drug dosage to improve prescribing practice. *Cochrane Database Syst Rev*(3), Cd002894. doi:10.1002/14651858.CD002894.pub2

Gagnon, M. P., Desmartis, M., Labrecque, M., Car, J., Pagliari, C., Pluye, P., . . . Legare, F. (2012). Systematic review of factors influencing the adoption of information and communication technologies by healthcare professionals. *Journal of Medical Systems*, 36(1), 241-277.

Gagnon, M. P., Pluye, P., Desmartis, M., Car, J., Pagliari, C., Labrecque, M., . . . Legare, F. (2010). A systematic review of interventions promoting clinical information retrieval technology (CIRT) adoption by healthcare professionals. *International Journal of Medical Informatics*, 79(10), 669-680.

- Hemens, B. J., Holbrook, A., Tonkin, M., Mackay, J. A., Weise-Kelly, L., Navarro, T., . . . Haynes, R. B. (2011). Computerized clinical decision support systems for drug prescribing and management: a decision-maker-researcher partnership systematic review. *Implementation Science*, 6, 89-89.
- Holroyd-Leduc, J. M., Lorenzetti, D., Straus, S. E., Sykes, L., & Quan, H. (2011). The impact of the electronic medical record on structure, process, and outcomes within primary care: A systematic review of the evidence. *Journal of the American Medical Informatics Association*, 18(6), 732-737.
- Huryk, L. A. (2010). Factors influencing nurses' attitudes towards healthcare information technology. *J Nurs Manag*, 18(5), 606-612. doi:10.1111/j.1365-2834.2010.01084.x
- Inglis, S. C., Clark, R. A., McAlister, F. A., Stewart, S., & Cleland, J. G. (2011). Which components of heart failure programmes are effective? A systematic review and meta-analysis of the outcomes of structured telephone support or telemonitoring as the primary component of chronic heart failure management in 8323 patients: Abridged Cochrane Review. *Eur J Heart Fail*, 13(9), 1028-1040. doi:10.1093/eurjhf/hfr039
- Jennett, P. A., Hall, L. A., Hailey, D., Ohinmaa, A., Anderson, C., Thomas, R., . . . Scott, R. E. (2003). The socio-economic impact of telehealth: a systematic review. *Journal of Telemedicine and Telecare*, 9(6), 311-320.
- Johansson, T., & Wild, C. (2010). Telemedicine in acute stroke management: systematic review (Structured abstract). *International Journal of Technology Assessment in Health Care*, 26(2), 149-155. Retrieved from <http://onlinelibrary.wiley.com/o/cochrane/cldare/articles/DARE-12010004058/frame.html>
- Kawamoto, K., Houlihan, C. A., Balas, E. A., & Lobach, D. F. (2005). Improving clinical practice using clinical decision support systems: a systematic review of trials to identify features critical to success (Structured abstract). *Bmj*, 330(4), 765. Retrieved from <http://onlinelibrary.wiley.com/o/cochrane/cldare/articles/DARE-12005008198/frame.html>
- Keane, M. G. (2009). A review of the role of telemedicine in the accident and emergency department. *Journal of Telemedicine and Telecare*, 15(3), 132-134. doi:10.1258/jtt.2009.003008

- Koivunen, M., & Saranto, K. (2014). Nursing professionals' experiences of the facilitators and barriers to the use of telehealth applications: - A systematic review of qualitative evidence. *JBI Database of Systematic Reviews and Implementation Reports*, 10(57), 3894-3906.
- Kukreti, V., Cosby, R., Cheung, A., & Lankshear, S. (2014). Computerized prescriber order entry in the outpatient oncology setting: From evidence to meaningful use. *Current Oncology*, 21(4), e604-e612.
- Lindberg, B., Nilsson, C., Zotterman, D., Soderberg, S., & Skar, L. (2013). Using Information and Communication Technology in Home Care for Communication between Patients, Family Members, and Healthcare Professionals: A Systematic Review. *Int J Telemed Appl*, 2013, 461829. doi:10.1155/2013/461829
- Lluch, M. (2011). Healthcare professionals' organisational barriers to health information technologies-A literature review. *International Journal of Medical Informatics*, 80(12), 849-862.
- MacLure, K., Stewart, D., McHattie, L., & Strath, A. (2011). A systematic review of the impact of technology on shared care: Why not ask your pharmacist? *International Journal of Pharmacy Practice*, 19, 98-99.
- MacLure, K., Stewart, D., & Strath, A. (2014). Mind the gap: Multidisciplinary team perceptions of ehealth in relation to integrated care. *International Journal of Pharmacy Practice*, 22, 16.
- Maclure, K., Stewart, D., & Strath, A. (2014). A systematic review of medical and non-medical practitioners' views of the impact of ehealth on shared care. *European Journal of Hospital Pharmacy: Science and Practice*, 21(1), 54-62.
- Martin, S., Kelly, G., Kernohan, W. G., McCreight, B., & Nugent, C. (2008). Smart home technologies for health and social care support. *Cochrane Database of Systematic Reviews*, (4). Retrieved from <http://onlinelibrary.wiley.com/doi/10.1002/14651858.CD006412.pub2/abstract> doi:10.1002/14651858.CD006412.pub2
- McGinn, C. A., Grenier, S., Duplantie, J., Shaw, N., Sicotte, C., Mathieu, L., . . . Gagnon, M. (2011). Comparison of user groups' perspectives of barriers and facilitators to implementing electronic health records: A systematic review. *BMC Medicine*, 9.

- McGowan, J., Grad, R., Pluye, P., Hannes, K., Deane, K., Labrecque, M., . . . Tugwell, P. (2009). Electronic retrieval of health information by healthcare providers to improve practice and patient care. *Cochrane Database of Systematic Reviews*, (3). Retrieved from <http://onlinelibrary.wiley.com/doi/10.1002/14651858.CD004749.pub2/abstract> doi:10.1002/14651858.CD004749.pub2
- McKibbin, K. A., Lokker, C., Handler, S. M., Dolovich, L. R., Holbrook, A. M., O'Reilly, D., . . . Roshanov, P. S. (2012). The effectiveness of integrated health information technologies across the phases of medication management: a systematic review of randomized controlled trials. *J Am Med Inform Assoc*, *19*(1), 22-30. doi:10.1136/amiajnl-2011-000304
- Merkouris, A. V. (1995). Computer-based documentation and bedside terminals. *J Nurs Manag*, *3*(2), 81-85.
- Nguyen, C., McElroy, L. M., Abecassis, M. M., Holl, J. L., & Ladner, D. P. (2015). The use of technology for urgent clinician to clinician communications: A systematic review of the literature. *International Journal of Medical Informatics*, *84*(2), 101-110.
- Osborn, C. Y., Mayberry, L. S., Mulvaney, S. A., & Hess, R. (2010). Patient web portals to improve diabetes outcomes: A systematic review. *Current Diabetes Reports*, *10*(6), 422-435.
- Pappas, Y., Atherton, H., Sawmynaden, P., & Car, J. (2012). Email for clinical communication between healthcare professionals. *Cochrane Database of Systematic Reviews*, (9). Retrieved from <http://onlinelibrary.wiley.com/doi/10.1002/14651858.CD007979.pub2/abstract> doi:10.1002/14651858.CD007979.pub2
- Pearson, S. A., Moxey, A., Robertson, J., Hains, I., Williamson, M., Reeve, J., & Newby, D. (2009). Do computerised clinical decision support systems for prescribing change practice? A systematic review of the literature (1990-2007). *BMC Health Services Research*, *9*, 154-154. doi:10.1186/1472-6963-9-154
- Roine, R., Ohinmaa, A., & Hailey, D. (2001). Assessing telemedicine: a systematic review of the literature. *Canadian Medical Association Journal*, *165*(6), 765-771.
- Roshanov, P. S., You, J. J., Dhaliwal, J., Koff, D., Mackay, J. A., Weise-Kelly, L., . . . Haynes, R. B. (2011). Can computerized clinical decision support systems improve practitioners' diagnostic test ordering behavior? A decision-maker-researcher partnership systematic review. *Implementation Science*, *6*, 88-88.

Sant'Anna Vargas, G., Lima da Silva, J. L., Marinho Chrizostimo, M., & Pereira Rodrigues, D. (2013). Electronic medical record as a facilitator tool in control of infections related to assistance: integrative review. *Journal of Nursing UFPE*, 7(7S), 4831-4840. doi:10.5205/reuol.4700-39563-1-ED.0707esp201303

Sawmynaden, P., Atherton, H., Majeed, A., & Car, J. (2012). Email for the provision of information on disease prevention and health promotion. *Cochrane Database of Systematic Reviews*, (11). Retrieved from <http://onlinelibrary.wiley.com/doi/10.1002/14651858.CD007982.pub2/abstract> doi:10.1002/14651858.CD007982.pub2

Shojania, K. G., Ranji, S. R., McDonald, K. M., Grimshaw, J. M., Sundaram, V., Rushakoff, R. J., & Owens, D. K. (2006). Effects of quality improvement strategies for type 2 diabetes on glycemic control: a meta-regression analysis. *Jama*, 296(4), 427-440. doi:10.1001/jama.296.4.427

Vedel, I., Akhlaghpour, S., Vaghefi, I., Bergman, H., & Lapointe, L. (2013). Health information technologies in geriatrics and gerontology: a mixed systematic review. *Journal of the American Medical Informatics Association*, 20(6), 1109-1119.

Wei, I., Pappas, Y., Car, J., Sheikh, A., & Majeed, A. (2011). Computer-assisted versus oral-and-written dietary history taking for diabetes mellitus. *Cochrane Database of Systematic Reviews*, (12). Retrieved from <http://onlinelibrary.wiley.com/doi/10.1002/14651858.CD008488.pub2/abstract> doi:10.1002/14651858.CD008488.pub2

Young, L. B., Chan, P. S., & Cram, P. (2011). Staff acceptance of tele-ICU coverage: a systematic review. *Chest*, 139(2), 279-288. doi:10.1378/chest.10-1795

Yu, C. H., Bahniwal, R., Laupacis, A., Leung, E., Orr, M. S., & Straus, S. E. (2012). Systematic review and evaluation of web-accessible tools for management of diabetes and related cardiovascular risk factors by patients and healthcare providers (Structured abstract). *Journal of the American Medical Informatics Association*, 19(4), 514-522. Retrieved from <http://onlinelibrary.wiley.com/o/cochrane/cldare/articles/DARE-12012041930/frame.html>
