# Supplementary material for: Impact of Information and Communication Technologies on Nursing Care: Results of an Overview of Systematic Reviews
Source: PubMed Central journal article supplement (PMC5424122; doi:10.2196/jmir.6686), 2017-04-25
Supplement: jmir_v19i4e122_app4.pdf [file jmir_v19i4e122_app4.pdf]

#### Appendix 4. General characteristics of included reviews.

| Review          | Type of review | Design of included studies                                                                                                                                                                                              | Number of studies             | Search dates | Target populations (n)                                  | Health care settings                                                                                          |
|-----------------|----------------|-------------------------------------------------------------------------------------------------------------------------------------------------------------------------------------------------------------------------|-------------------------------|--------------|---------------------------------------------------------|---------------------------------------------------------------------------------------------------------------|
| Anderson (2008) | Mixed          | Various, including qualitative, experimental, quasi-experimental, and nonexperimental                                                                                                                                   | 17                            | Not reported | Nurses                                                  | Emergency department (ED), oncology nursing, in-hospital clinic, long-term care, neonatal unit, critical care |
| Bartoli (2009)  | Mixed          | Various including quantitative and qualitative (no specific designs were mentioned)                                                                                                                                     | 17 from 40 full-text articles | 1996-2008    | Patients (1236); nurses (23)                            | Not specified                                                                                                 |
| Bowles (2007)   | Mixed          | Various, including prospective, pre- and posttest, group case control, observational, descriptive, randomized trial, intervention group only, pilot study, longitudinal, quasi-experimental, retrospective chart review | 19                            | 1995-2005    | <i>For those numbered:</i> patients (1554), nurses (26) | Home care                                                                                                     |

|                    |                             |                                                                                                                                               |     |                                  |                                                                                                                                                                                                      |                                                                                 |
|--------------------|-----------------------------|-----------------------------------------------------------------------------------------------------------------------------------------------|-----|----------------------------------|------------------------------------------------------------------------------------------------------------------------------------------------------------------------------------------------------|---------------------------------------------------------------------------------|
| Carrington (2013)  | Rapid review (mixed)        | Various, including qualitative, quantitative, and mixed-methods                                                                               | 80  | August 1, 2011 to August 1, 2012 | Nurses and nurse managers                                                                                                                                                                            | Hospital; community; online; education, ambulatory; home health; long-term care |
| Dowding (2015)     | Rapid review (quantitative) | Various, including before-after study, usability study, cluster randomized controlled trial (RCT), noncomparative study, time series analysis | 11  | November 1996 to December 2012   | Patients (20), nurses (not numbered), clinical staff (175), mental health professionals (21), primary care physicians (72), clinicians (258), radiologists (47), anesthesists (29), pharmacists (51) | Primary care practices                                                          |
| Finkelstein (2012) | Mixed                       | Various, including quantitative (eg, RCT), qualitative, and usability studies                                                                 | 327 | Unspecified to July 31, 2010     | Physicians, patients, nurses, providers (clinic staff, clinicians), pharmacists                                                                                                                      | Home health care; clinic; primary care health center; hospital                  |

|                 |              |                                                                                   |    |                                |                                                                                                                                                                                                                                                                                       |                             |
|-----------------|--------------|-----------------------------------------------------------------------------------|----|--------------------------------|---------------------------------------------------------------------------------------------------------------------------------------------------------------------------------------------------------------------------------------------------------------------------------------|-----------------------------|
| Free (2013)     | Quantitative | Controlled trials                                                                 | 42 | January 1990 to September 2010 | <i>For those numbered:</i> medical students (361), residents (356), physicians (80), second-year baccalaureate nursing students (36), nurse anesthetists (4), undergraduate nurses (87), nursing coordinators (16), nurses (71), patients (3767), patient scans (42), volunteers (62) | Acute care hospital; clinic |
| Georgiou (2013) | Quantitative | Various including: pre-post design, prospective studies, RCT, time series studies | 22 | January 1990 to May 2011       | <i>For those numbered:</i> patients (32182); physicians (126); nurses (26)                                                                                                                                                                                                            | ED                          |

|               |                               |                                                                                                                                                         |    |                                           |                                                                                                                                                                                                                      |                                                                                   |
|---------------|-------------------------------|---------------------------------------------------------------------------------------------------------------------------------------------------------|----|-------------------------------------------|----------------------------------------------------------------------------------------------------------------------------------------------------------------------------------------------------------------------|-----------------------------------------------------------------------------------|
| Husebo (2014) | An integrative review (mixed) | Various including RCT, descriptive, qualitative, longitudinal study, quasi-experimental with qualitative data, cross-sectional study                    | 12 | January 2003 to April 2013                | Elderly patients aged 65 years and over (548), nurses (57), professionals caregivers (4), family users (8)                                                                                                           | Home health care                                                                  |
| Jones (2002)  | Integrated review             | Various including retrospective review, randomized prospective trial, cross-over design, pair wise comparison, randomized field experience, qualitative | 18 | 1966-2001                                 | Nurses, adult clients of a medical ambulatory clinic (152), patients (188), elderly (68, home care patients), residents long-term facility (120), patients receiving telenursing (22), caregivers of Alzheimer (102) | Medical ambulatory clinic, home care, long-term care facility, psychiatry service |
| Kelley (2011) | Integrative                   | Various, including descriptive and cross-sectional designs                                                                                              | 24 | Articles published over the past 30 years | Nurses                                                                                                                                                                                                               | Hospital settings                                                                 |

|                |              |                                                                                                                                  |    |           |                                                                                                                                                                                                                                                                           |                                                                                                                                                                       |
|----------------|--------------|----------------------------------------------------------------------------------------------------------------------------------|----|-----------|---------------------------------------------------------------------------------------------------------------------------------------------------------------------------------------------------------------------------------------------------------------------------|-----------------------------------------------------------------------------------------------------------------------------------------------------------------------|
| Mador (2009)   | Quantitative | Various including pre-and posttest, prospective observational analysis, RCT, comparative observational design, meta-analysis     | 12 | 1937-2008 | Nurses, physicians, ward secretaries, respiratory therapists, and technologist                                                                                                                                                                                            | Intensive care unit (ICU)                                                                                                                                             |
| Maenpaa (2009) | Mixed        | Various, including survey research, case study, evaluation or constructive evaluation studies, and multimethodical triangulation | 24 | 1966-2008 | <i>For those numbered:</i> participants (262), health professionals (318), patients (324), nurses (41), physicians (1390), potential users (250), administrators (8), managers (12), representative of federally qualified clinic (1), local public health officials (2). | Community health centers, health departments and hospitals, provider organizations, academic health centers, and community health information exchange organizations. |

|                 |                  |                                                                                                 |     |                              |                                                                                                                                                                                                   |                                                                                                                          |
|-----------------|------------------|-------------------------------------------------------------------------------------------------|-----|------------------------------|---------------------------------------------------------------------------------------------------------------------------------------------------------------------------------------------------|--------------------------------------------------------------------------------------------------------------------------|
| McKibbon (2011) | Mixed            | Various, including RCT, cohort, case-control, observational, and qualitative studies            | 789 | Fall 2009 to Summer 2010.    | Physicians, pharmacists, nurses, junior students, residents, respiratory technicians, health care providers, clinicians, physician assistants, midwives, staff, patients, hospital administrators | Ambulatory care; hospital; ambulatory clinic; acute care; American pediatric hospital; long-term care; elderly home care |
| Meißner (2014)  | Meta-ethnography | Qualitative                                                                                     | 7   | January 2000 to January 2013 | Administrators, director of nursing, nurses, charge nurses, personal carers                                                                                                                       | Residential aged care facilities                                                                                         |
| Mickan (2014)   | Quantitative     | RCT                                                                                             | 7   | 2001-2013                    | physicians and residents, nursing students, RN <sup>a</sup> , patients                                                                                                                            | Clinic, ED, med-surg wards                                                                                               |
| Nguyen (2014)   | Mixed            | Various including single and multiple case studies, survey, ethnography, focus group, secondary | 98  | 2001-2011                    | Clinicians (34, doctors and nurses), doctors only                                                                                                                                                 | Tertiary care, secondary care, primary care, long-                                                                       |

|                  |              |                                                   |    |                                                                                          |                                                                                                                                                                                                                      |                                                                                                             |
|------------------|--------------|---------------------------------------------------|----|------------------------------------------------------------------------------------------|----------------------------------------------------------------------------------------------------------------------------------------------------------------------------------------------------------------------|-------------------------------------------------------------------------------------------------------------|
|                  |              | data analysis, mixed-methods, longitudinal        |    |                                                                                          | (27), doctors and other nonclinical participants (4), nurses and nonclinical participants (12), management and/or administration only (8), patients only (5), organizations (4), IT <sup>b</sup> providers and staff | term care facilities                                                                                        |
| Nieuwlaat (2011) | Quantitative | RCT                                               | 33 | In previous review: until September 2004; current review: extended search until Jan 2010 | Patients (24,627), physicians, advanced practice nurses (APN), physician assistants, pharmacists, other health professionals                                                                                         | Academic centers, hospital outpatients or inpatients, primary care, community-based and subspecialty clinic |
| Poissant (2005)  | Quantitative | Various, including RCT, posttest control studies, | 23 | 1990-2004                                                                                | Physicians, nurses (215)                                                                                                                                                                                             | Home, hospital, clinic                                                                                      |

|                  |                         |                                                                                               |   |                                                                |                                                              |                                                                     |
|------------------|-------------------------|-----------------------------------------------------------------------------------------------|---|----------------------------------------------------------------|--------------------------------------------------------------|---------------------------------------------------------------------|
|                  |                         | one-group pre- and posttest designs.                                                          |   |                                                                |                                                              |                                                                     |
| Randell (2007)   | Quantitative            | RCT                                                                                           | 9 | Up to April 2005. The search was rerun in May 2006.            | Nurses (100 and more), patients (more than 24,000)           | Primary care, National Health Service (NHS), ICU                    |
| Stevenson (2010) | Mixed                   | Various, including descriptive, cross-sectional, pre- and postquasi-experimental, qualitative | 5 | 2000-2009                                                      | Midwives, nurses, nursing assistants, project managers (326) | Acute or inpatient care settings                                    |
| Urquhart (2009)  | Quantitative (Cochrane) | 8 RCT; 1 controlled before and after study                                                    | 9 | Update of 2000 and 2003 review; searched up to the end of 2007 | Patients and nurses (1846 in total)                          | Nursing wards, long-term care facility, psychiatric department, ICU |

<sup>a</sup>RN: registered nurse.

<sup>b</sup>IT: information technology.



## References

- Anderson JA, Willson P. Clinical decision support systems in nursing: synthesis of the science for evidence-based practice. *Comput Inform Nurs.* 2008;26(3):151-158. PMID: 2009922759
- Bartoli L, Zanaboni P, Masella C, Ursini N. Systematic review of telemedicine services for patients affected by chronic obstructive pulmonary disease (COPD). *Telemed J E Health.* 2009;15(9):877-883. PMID: 19919194
- Bowles KH, Baugh AC. Applying research evidence to optimize telehomecare. *J Cardiovasc Nurs.* 2007 Jan-Feb;22(1):5-15. PMID: 17224692
- Carrington JM, Tiase VL. Nursing informatics year in review. *Nurs Adm Q.* 2013;37(2):136-143. PMID: 23454993
- Dowding D, Randell R, Gardner P, et al. Dashboards for improving patient care: Review of the literature. *Int J Med Inform.* 2015 Oct 12;84(2):87-100. PMID: 25453274
- Finkelstein J, Knight A, Marinopoulos S, et al. Enabling patient-centered care through health information technology. Rockville, MD: Agency for Healthcare Research and Quality, 2012 Jun. Report No.: 1530-4396 Contract No.: 206. Accessed 206. PMID: 24422882
- Free C, Phillips G, Watson L, et al. The effectiveness of mobile-health technologies to improve health care service delivery processes: a systematic review and meta-analysis. *PLoS Med.* 2013;10(1):e1001363. PMID: 23458994
- Georgiou A, Prgomet M, Paoloni R, et al. The effect of computerized provider order entry systems on clinical care and work processes in emergency departments: a systematic review of the quantitative literature. *Ann Emerg Med.* 2013 Jun;61(6):644-653. PMID: 23548404
- Husebo AML, Storm M. Virtual visits in home health care for older adults. *ScientificWorldJournal.* 2014;Article ID 689873. PMID: 25506616
- Jones JF, Brennan PF. Telehealth interventions to improve clinical nursing of elders. *Annu Rev Nurs Res.* 2002;20:293-322. PMID: 12092513
- Kelley TF, Brandon DH, Docherty SL. Electronic nursing documentation as a strategy to improve quality of patient care. *J Nurs Scholarsh.* 2011 Jun;43(2):154-162. PMID: 21605319
- Mador RL, Shaw NT. The impact of a Critical Care Information System (CCIS) on time spent charting and in direct patient care by staff in the ICU: A review of the literature. *Int J Med Inform.* 2009;78(7):435-445. PMID: 19261544

Maenpaa T, Suominen T, Asikainen P, Maass M, Rostila I. The outcomes of regional healthcare information systems in health care: A review of the research literature. *Int J Med Inform.* 2009;78(11):757-771. PMID: 19656719

McKibbon KA, Lokker C, Handler SM, et al. Enabling medication management through health information technology (Health IT). Evidence report/technology assessment: 2011 Apr. Report No.: 1530-4396 Contract No.: 201. Accessed 201. PMID: 23126642

Meißner A, Schnepf W. Staff experiences within the implementation of computer-based nursing records in residential aged care facilities: a systematic review and synthesis of qualitative research. *BMC Med Inform Decis Mak.* 2014;14:54. PMID: 24947420

Mickan S, Atherton H, Roberts NW, Heneghan C, Tilson JK. Use of handheld computers in clinical practice: a systematic review. *BMC Med Inform Decis Mak.* 2014;14:56. PMID: 24998515

Nguyen C, McElroy LM, Abecassis MM, Holl JL, Ladner DP. The use of technology for urgent clinician to clinician communications: A systematic review of the literature. *Int J Med Inform.* 2015 Feb;84(2):101-110. PMID: 25444594

Nieuwlaat R, Connolly SJ, Mackay JA, et al. Computerized clinical decision support systems for therapeutic drug monitoring and dosing: a decision-maker-researcher partnership systematic review. *Implement Sci.* 2011;6:90. PMID: 21824384

Poissant L, Pereira J, Tamblyn R, Kawasumi Y. The impact of electronic health records on time efficiency of physicians and nurses: a systematic review. *J Am Med Inform Assoc.* 2005 Sep-Oct;12(5):505-516. PMID: 15905487

Randell R, Mitchell N, Dowding D, Cullum N, Thompson C. Effects of computerized decision support systems on nursing performance and patient outcomes: a systematic review. *J Health Serv Res Policy.* 2007 Oct;12(4):242-249. PMID: 17925077

Stevenson JE, Nilsson GC, Petersson GI, Johansson PE. Nurses'™ experience of using electronic patient records in everyday practice in acute/inpatient ward settings: A literature review. *Health Informatics J.* 2010;16(1):63-72. PMID: 20413414

Urquhart C, Currell R, Grant MJ, Hardiker NR. Nursing record systems: effects on nursing practice and healthcare outcomes. *Cochrane Database Syst Rev.* 2009;Art. No.: CD002099(Issue 1). PMID: 19160206
